# Supplementary material for: Genome-wide Association Meta-analysis of Childhood and Adolescent Internalizing Symptoms
Source: PubMed Central journal article supplement (PMC10859168; doi:10.1016/j.jaac.2021.11.035), 2022-04-01
Supplement: NIHMS1913134-supplement-Index.pdf [file NIHMS1913134-supplement-Index.pdf]

## Index. Description of Supplementary Tables

| Table | Description                                            |
|-------|--------------------------------------------------------|
| S1    | Cohorts included                                       |
| S2    | Maximum sample size contribution of each cohort        |
| S3    | Overview of instruments used                           |
| S4    | Phenotypic descriptive statistics per GWAS             |
| S5    | Overview of genotyping, quality control and imputation |
| S6    | Cohort-specific covariates                             |
| S7    | Number of SNPs before and after EasyQC, per GWAS       |
| S8    | Stratified analyses of internalising symptoms          |
| S9    | List of external phenotypes for genetic correlations   |
| S10   | MAGMA gene-based test                                  |
| S11   | MAGMA tissue expression analyses                       |
| S12   | MAGMA gene-set analysis                                |
| S13   | Genetic correlations with external phenotypes          |
| S14   | Polygenic score analyses                               |

**Table S1** Cohorts included

| Full name                                                                                                                                                                                                                                             | Abbreviation  | Country                  | Ascertainment                                               |
|-------------------------------------------------------------------------------------------------------------------------------------------------------------------------------------------------------------------------------------------------------|---------------|--------------------------|-------------------------------------------------------------|
| The 1958 Birth Cohort                                                                                                                                                                                                                                 | 1958BC        | United Kingdom           | population-based                                            |
| Adolescent Brain Cognitive Development Study                                                                                                                                                                                                          | ABCD          | United States of America | population-based                                            |
| The National Longitudinal Study of Adolescent to Adult Health                                                                                                                                                                                         | Add Health    | United States of America | population-based                                            |
| Avon Longitudinal Study of Parents and Children                                                                                                                                                                                                       | ALSPAC        | United Kingdom           | population-based (family-based birth cohort)                |
| Brain dEvelopment and Air polluTion ultrafine particles in scHool childrEn                                                                                                                                                                            | BREATHE       | Spain                    | population-based                                            |
| Child and Adolescent Twin Study in Sweden                                                                                                                                                                                                             | CATSS         | Sweden                   | population-based (twin families)                            |
| Finnish Twin Cohort                                                                                                                                                                                                                                   | FinnTwin12    | Finland                  | population-based (twin families)                            |
| Generation R Study                                                                                                                                                                                                                                    | Gen-R         | the Netherlands          | population-based                                            |
| German Infant study on the influence of Nutrition Intervention PLUS environmental and genetic influences on allergy development / The influence of Life-style factors on the development of the Immune Ssystem and Allergies in East and West Germany | GINIplus/LISA | Germany                  | population-based (birth cohort)                             |
| Great Smoky Mountains Study                                                                                                                                                                                                                           | GSMS          | United States of America | population-based                                            |
| Institute for Behavioral Genetics                                                                                                                                                                                                                     | IBG           | United States of America | population-based (twin families) and clinically ascertained |
| Norwegian Mother, Father and Child Cohort Study                                                                                                                                                                                                       | MoBa          | Norway                   | population-based (pregnancy cohort)                         |
| Michigan State University Twin Register                                                                                                                                                                                                               | MSUTR         | United States of America | population-based (twin families)                            |
| Mater University of Queensland Study of Pregnancy                                                                                                                                                                                                     | MUSP          | Australia                | population-based (pregnancy cohort)                         |
| Northern Finland Birth Cohort 1986                                                                                                                                                                                                                    | NFBC1986      | Finland                  | population-based (pregnancy cohort)                         |
| Netherlands Twin Register                                                                                                                                                                                                                             | NTR           | the Netherlands          | population-based (twin families)                            |
| Philadelphia Neurodevelopmental Cohort                                                                                                                                                                                                                | PNC           | United States of America | population-based                                            |
| The Raine Study                                                                                                                                                                                                                                       | Raine Study   | Australia                | population-based (pregnancy cohort)                         |
| Twin Early Development Study                                                                                                                                                                                                                          | TEDS          | United Kingdom           | population-based (twin families)                            |
| TRacking Adolescents' Individual Lives Survey                                                                                                                                                                                                         | TRAILS        | the Netherlands          | population-based                                            |
| Virginia Twin Study of Adolescent Behavioral Development                                                                                                                                                                                              | VTSABD        | United States of America | population-based (twin families)                            |
| Young Finns Study                                                                                                                                                                                                                                     | YFS           | Finland                  | population-based (birth cohort)                             |

**Table S2** Maximum sample size contribution of each cohort $N_{\text{unique}}$  = number of unique individuals;  $N_{\text{GWASs}}$  = number of GWASs;  $N_{\text{obs}}$  = total number of observations

| Cohort        | $N_{\text{unique}}$ | $N_{\text{GWASs}}$ | $N_{\text{obs}}$ |
|---------------|---------------------|--------------------|------------------|
| 1958BC        | 4644                | 12                 | 25684            |
| ABCD          | 3677                | 2                  | 3677             |
| Add Health    | 4809                | 5                  | 8213             |
| ALSPAC        | 5707                | 9                  | 42733            |
| BREATHE       | 1156                | 1                  | 1156             |
| CATSS         | 7565                | 3                  | 14712            |
| FinnTwin12    | 1095                | 7                  | 7033             |
| Gen-R         | 2107                | 6                  | 10075            |
| GINIplus/LISA | 1389                | 2                  | 2583             |
| GSMS          | 612                 | 4                  | 2190             |
| IBG           | 777                 | 4                  | 2519             |
| MoBa          | 6552                | 8                  | 19514            |
| MSUTR         | 1015                | 1                  | 1015             |
| MUSP          | 1225                | 2                  | 2396             |
| NFBC1986      | 3418                | 2                  | 5838             |
| NTR           | 4861                | 15                 | 40723            |
| PNC           | 3129                | 3                  | 3129             |
| Raine Study   | 1366                | 4                  | 5407             |
| TEDS          | 5579                | 18                 | 34826            |
| TRAILS        | 1660                | 8                  | 11505            |
| VTSABD        | 690                 | 8                  | 4616             |
| YFS           | 1608                | 1                  | 1608             |
| Total         | 64641               | 125                | 251152           |

**Table S3** Overview of instruments used

| Instrument                                                                                                                                        | Scale                  | Reference                                                                                                                                                                                                                                                                                                 |
|---------------------------------------------------------------------------------------------------------------------------------------------------|------------------------|-----------------------------------------------------------------------------------------------------------------------------------------------------------------------------------------------------------------------------------------------------------------------------------------------------------|
| Bristol Social Adjustment Guides (BSAG)                                                                                                           | Depression / anxiety   | Stott, D. H., & Sykes, E. G. (1963). Bristol Social-adjustment Guides. University of London Press.                                                                                                                                                                                                        |
| Child and Adolescent Psychiatric Assessment (CAPA)                                                                                                | Depression             | Angold, A., & Costello, E. J. (2000). The child and adolescent psychiatric assessment (CAPA). <i>Journal of the American Academy of Child &amp; Adolescent Psychiatry</i> , 39(1), 39-48.                                                                                                                 |
| Achenbach System of Empirically Based Assessment (ASEBA): Child Behavior Checklist (CBCL), Teacher-Report Form (TRF), and Youth Self Report (YSR) | Internalising problems | Achenbach, T. M. (2009). The Achenbach system of empirically based assessment (ASEBA): Development, findings, theory, and applications. University of Vermont, Research Center for Children, Youth, & Families.                                                                                           |
| Center for Epidemiologic Studies Depression Scale (CES-D)                                                                                         | Depression             | RADLOFF, L. (1997). Scale: A self-report depression scale for research in the general population. <i>J Clin Exp Neuropsychol</i> , 19, 340-356.                                                                                                                                                           |
| GOASSESS                                                                                                                                          | Depression             | Calkins, M. E., Merikangas, K. R., Moore, T. M., Burstein, M., Behr, M. A., Satterthwaite, T. D., ... & Qiu, H. (2015). The Philadelphia Neurodevelopmental Cohort: constructing a deep phenotyping collaborative. <i>Journal of Child Psychology and Psychiatry</i> , 56(12), 1356-1369.                 |
| Children's Manifest Anxiety Scale (MA)                                                                                                            | Anxiety                | Reynolds, C. R., & Richmond, B. O. (1979). Factor structure and construct validity of 'What I think and feel': The revised children's manifest anxiety scale. <i>Journal of Personality Assessment</i> , 43(3), 281-283.                                                                                  |
| Multidimensional Peer Nomination Inventory (MPNI)                                                                                                 | Depression             | Pulkkinen, L., Kaprio, J., & Rose, R. J. (1999). Peers, teachers and parents as assessors of the behavioural and emotional problems of twins and their adjustment: the Multidimensional Peer Nomination Inventory. <i>Twin Research and Human Genetics</i> , 2(4), 274-285.                               |
| Rutter Children's Behaviour Questionnaires for parents and teachers (Rutter)                                                                      | Internalising          | Rutter, M. (1967). A children's behaviour questionnaire for completion by teachers: preliminary findings. <i>Journal of child psychology and psychiatry</i> , 8(1), 1-11.<br>Rutter M, Tizard J, Whitmore K (Eds) (1970). <i>Education, health and behaviour</i> . London: Longman                        |
| Screen for Child Anxiety Related Disorders (SCARED)                                                                                               | Anxiety                | Birmaher, B., Khetarpal, S., Brent, D., Cully, M., Balach, L., Kaufman, J., et al. (1997). The Screen for Child Anxiety Related Emotional Disorders (SCARED): Scale construction and psychometric characteristics. <i>Journal of the American Academy of Child and Adolescent Psychiatry</i> 36: 545-553. |
| Strengths and Difficulties Questionnaire (SDQ)                                                                                                    | Emotional problems     | Goodman, R. (1997). The Strengths and Difficulties Questionnaire: a research note. <i>Journal of child psychology and psychiatry</i> , 38(5), 581-586.                                                                                                                                                    |
| Short Mood and Feelings Questionnaire (SMFQ)                                                                                                      | Depression             | Angold, A., Costello, E. J., Messer, S. C., Pickles, A., Winder, F., & Silver, D. (1995) The development of a short questionnaire for use in epidemiological studies of depression in children and adolescents. <i>International Journal of Methods in Psychiatric Research</i> , 5, 237 - 249.           |
| Young Finns Study (YFS)                                                                                                                           | Internalising          | Makkonen, T., Ruoppila, I., Rönkä, T., Timonen, S., Valvanne, L., & Österlund, K. (1981). Operation family. Mannerheim League of Child Welfare: Helsinki, Finland. <i>Child Report A</i> , 34.                                                                                                            |

Table S4 Phenotypic descriptive statistics per GWAS

| Cohort         | Rater   | Age       | N     | % male    | Age mean | SD         | Median   | IQR               | Phenotype | Mean      | Variance  | Skewness  | Kurtosis   |
|----------------|---------|-----------|-------|-----------|----------|------------|----------|-------------------|-----------|-----------|-----------|-----------|------------|
| 1958BC - DIL   | Mother  | 7         | 2156  | 48.47     | 7.334    | 0.242      | 7.253    | 7,168 - 7,420     | Rutter    | 2.278     | 1.60727   | 0.5821971 | -0.0352649 |
| 1958BC - WTCCC | Mother  | 7         | 2273  | 52.4      | 7.329    | 0.246      | 7.253    | 7,168 - 7,335     | Rutter    | 2.243     | 1.58113   | 0.6570402 | 0.1030381  |
| 1958BC - DIL   | Mother  | 11        | 2079  | 48.68     | 11.280   | 0.14       | 11.250   | 11,17 - 11,33     | Rutter    | 3.065     | 2.20103   | 0.9519038 | 0.9328037  |
| 1958BC - WTCCC | Mother  | 11        | 2169  | 52.33     | 11.290   | 0.151      | 11.250   | 11,17 - 11,33     | Rutter    | 3.065     | 2.20103   | 0.9519038 | 0.9328037  |
| 1958BC - DIL   | Mother  | 16        | 1941  | 48.27     | 16.070   | 0.193      | 16.010   | 15,95 - 16,10     | Rutter    | 1.854     | 1.74191   | 0.97631   | 0.6358359  |
| 1958BC - WTCCC | Mother  | 16        | 1973  | 51.85     | 16.070   | 0.193      | 16.010   | 15,95 - 17,20     | Rutter    | 1.778     | 1.72953   | 1.12000   | 1.23880    |
| 1958BC - DIL   | Teacher | 7         | 2272  | 48.72     | 7.334    | 0.242      | 7.253    | 7,168 - 7,420     | BSAG      | 3.341     | 4.32407   | 1.96765   | 4.48888    |
| 1958BC - WTCCC | Teacher | 7         | 2375  | 51.66     | 7.329    | 0.246      | 7.253    | 7,168 - 7,335     | BSAG      | 3.341     | 4.32407   | 1.96765   | 4.48888    |
| 1958BC - DIL   | Teacher | 11        | 2197  | 48.66     | 11.280   | 0.14       | 11.250   | 11,17 - 11,33     | BSAG      | 3.259     | 4.03119   | 1.74003   | 3.26911    |
| 1958BC - WTCCC | Teacher | 11        | 2256  | 52.48     | 11.290   | 0.151      | 11.250   | 11,17 - 11,33     | BSAG      | 3.231     | 4.00591   | 1.78950   | 3.66498    |
| 1958BC - DIL   | Teacher | 16        | 1959  | 48.49     | 16.070   | 0.193      | 16.010   | 15,95 - 16,10     | Rutter    | 1.078     | 1.43839   | 1.66122   | 2.88007    |
| 1958BC - WTCCC | Teacher | 16        | 2041  | 51.79     | 16.070   | 0.193      | 16.010   | 15,95 - 17,20     | Rutter    | 1.050     | 1.41610   | 1.67158   | 3.15934    |
| ABCD           | Parent  | 9         | 2392  | 47.69     | 9.679    | 0.4646224  | 9.750    | 9,250 - 10,083    | CBCL      | 5.077     | 26.97091  | 1.780239  | 8.116743   |
| ABCD           | Parent  | 12        | 1285  | 45.08     | 11.030   | 0.440329   | 10.920   | 10,67 - 11,33     | CBCL      | 5.542     | 34.11522  | 1.732664  | 6.649782   |
| Add Health W1  | Self    | 11 to 13  | 745   | 0.4053691 | 13.37248 | 0.3563188  | 13.40999 | 0.5804244         | CES-D     | 4.4120810 | 12.89582  | 1.338859  | 2.569783   |
| Add Health W1  | Self    | 14 to 16  | 2545  | 0.4671906 | 15.56989 | 0.812891   | 15.581   | 1.338809          | CES-D     | 5.6919450 | 18.08431  | 1.129507  | 1.528197   |
| Add Health W2  | Self    | 14 to 16  | 2055  | 0.448175  | 15.59840 | 0.8684523  | 15.66598 | 1.500342          | CES-D     | 5.3493920 | 17.598410 | 1.180533  | 1.716146   |
| Add Health W1  | Self    | 17 to 18  | 1519  | 0.4858460 | 17.89815 | 0.5087915  | 17.83162 | 0.8323066         | CES-D     | 5.8025020 | 18.0308   | 1.025044  | 1.018032   |
| Add Health W2  | Self    | 17 to 18  | 1349  | 0.4929577 | 17.88517 | 0.5418766  | 17.917   | 0.9144422         | CES-D     | 5.779837  | 18.821670 | 1.060509  | 1.135166   |
| ALSPAC         | Mother  | 47 months | 5,707 | 51.46     | 3.991    | 0.11635    | 4        | 4 - 4             | SDQ       | 1.436     | 2.27571   | 1.25545   | 4.61077    |
| ALSPAC         | Mother  | 81m       | 5,300 | 51.09     | 81.405   | 1.30365    | 81       | 81 - 81           | SDQ       | 1.477     | 2.67792   | 1.33225   | 4.73398    |
| ALSPAC         | Mother  | 97m       | 5,186 | 51.06     | 98.329   | 3.00712    | 97       | 97 - 99           | SDQ       | 1.654     | 3.23261   | 1.21411   | 4.21231    |
| ALSPAC         | Mother  | 115m      | 5,284 | 50.45     | 115.716  | 1.4271     | 115      | 115 - 116         | SDQ       | 1.436     | 2.83577   | 1.48438   | 5.38859    |
| ALSPAC         | Mother  | 140m      | 4,871 | 49.58     | 140.596  | 1.59266    | 140      | 140 - 141         | SDQ       | 1.401     | 2.76106   | 1.50666   | 5.47593    |
| ALSPAC         | Mother  | 157m      | 4,779 | 49.68     | 157.898  | 2.20092    | 157      | 157 - 158         | SDQ       | 1.371     | 2.71897   | 1.53001   | 5.49316    |
| ALSPAC         | Mother  | 198m      | 3,841 | 48.14     | 202.016  | 4.33833    | 200      | 198 - 205         | SDQ       | 1.42      | 3.25363   | 1.6735    | 6.05967    |
| ALSPAC         | Teacher | 7         | 3,537 | 50.55     | 99.953   | 3.77102    | 100      | 97 - 103          | SDQ       | 1.312     | 3.55788   | 1.734     | 5.92329    |
| ALSPAC         | Teacher | 10        | 4,228 | 50.26     | 133.927  | 3.94391    | 134      | 131 - 137         | SDQ       | 1.235     | 3.29366   | 1.79473   | 6.28513    |
| BREATHE        | Parent  | 8         | 1156  | 52.59     | 8.01     | 0.57       | 7.990    | 7,52 - 8,52       | SDQ       | 1.790     | 3.09000   | 1.173886  | 4.366369   |
| CATSS          | Mother  | 15        | 6272  | 47.86     | 15.470   | 0.532      | 15.000   | 15 - 16           | SDQ       | 6.141     | 2.57100   | 1.81923   | 3.67632    |
| CATSS          | Father  | 15        | 1237  | 52.46     | 15.530   | 0.53       | 16.000   | 15 - 16           | SDQ       | 6.075     | 2.20800   | 1.77246   | 3.61692    |
| CATSS          | Self    | 15        | 7729  | 46.91     | 15.470   | 0.52       | 15.000   | 15 - 16           | SDQ       | 7.888     | 5.068     | 0.72636   | -0.08182   |
| FinnTwin12     | Parent  | 12        | 1088  | 45.80     | 11.780   | 0.27355    | 11.790   | 11,58 - 12,02     | MPNI      | 0.768     | 0.18600   | 0.742     | 3.46       |
| FinnTwin12     | Teacher | 12        | 1095  | 45.40     | 11.550   | 0.30223    | 11.560   | 11,33 - 11,78     | MPNI      | 0.698     | 0.25400   | 0.83600   | 3.50000    |
| FinnTwin12     | Teacher | 14        | 851   | 44.90     | 14.230   | 0.20711    | 14.180   | 14,10 - 14,28     | MPNI      | 0.610     | 0.25700   | 1.19700   | 4.54000    |
| FinnTwin12     | Self    | 14        | 990   | 45.90     | 14.200   | 0.14716    | 14.150   | 14,10 - 14,25     | MPNI      | 0.722     | 0.14100   | 0.737     | 4.32       |
| FinnTwin12     | Self    | 17        | 1023  | 44.50     | 17.610   | 0.19643    | 17.610   | 17,45 - 17,74     | MPNI      | 0.974     | 0.31000   | 0.726     | 3.46       |
| FinnTwin12     | Co-twin | 14        | 978   | 46.40     | 14.200   | 0.15137    | 14.150   | 14,10 - 14,25     | MPNI      | 0.661     | 0.16700   | 0.68800   | 3.42000    |
| FinnTwin12     | Co-twin | 17        | 1008  | 44.70     | 17.610   | 0.19674    | 17.610   | 17,45 - 17,74     | MPNI      | 0.826     | 0.25800   | 0.57200   | 3.16000    |
| Gen-R          | Mother  | 3         | 1822  | 50.55     | 3.041    | 0.09452612 | 3.008    | 3.060046-2.985813 | CBCL      | 4.188     | 14.73114  | 1.917439  | 7.111043   |
| Gen-R          | Parent  | 6         | 2107  | 49.88     | 5.997    | 0.38016693 | 5.936    | 6.106346-5.776421 | CBCL      | 5.253     | 29.01922  | 2.304842  | 8.514811   |
| Gen-R          | Mother  | 10        | 1792  | 50.95     | 9.706    | 0.2890987  | 9.659    | 9.812457-9.552361 | CBCL      | 4.574     | 23.24786  | 1.971168  | 5.654143   |
| Gen-R          | Father  | 3         | 1626  | 50.12     | 3.051    | 0.10099251 | 3.022    | 3.071044-2.991312 | CBCL      | 4.829     | 18.18892  | 1.467397  | 3.29202    |
| Gen-R          | Father  | 10        | 1459  | 51.47     | 9.787    | 0.31452324 | 9.747    | 9.883641-9.626283 | CBCL      | 4.618     | 21.71183  | 1.867677  | 5.182892   |
| Gen-R          | Teacher | 7         | 1269  | 47.60     | 6.662    | 1.30350916 | 6.149    | 7.612312-5.674695 | TRF       | 2.671     | 16.45544  | 2.88016   | 12.16173   |
| GINiplus/LISA  | Parent  | 10        | 1389  | 51.84     | 10.03767 | 0.1986648  | 9.99     | 9.93-10.08        | SDQ       | 1.835     | 3.699655  | 1.25335   | 4.335736   |
| GINiplus/LISA  | Self    | 15        | 1194  | 51.09%    | 15.21439 | 0.2993654  | 15.14    | 15.01-15.33       | SDQ       | 2.12172   | 4.162479  | 1.062519  | 3.63407    |
| GSMS           | Parent  | 12        | 611   | 56.00     | 12.834   | 0.72652    | 12.972   | 12,118 - 13,246   | CAPA      | 0.28922   | 0.46123   | 2.80814   | 8.63624    |
| GSMS           | Parent  | 15        | 572   | 56.00     | 15.496   | 0.57294    | 15.228   | 15,0719 - 15,9398 | CAPA      | 0.234     | 0.43822   | 3.2948    | 11.22892   |
| GSMS           | Self    | 12        | 611   | 56.0      | 12.834   | 0.72652    | 12.972   | 12-12 - 13,25     | CAPA      | 0.26471   | 0.42409   | 3.23964   | 13.28012   |
| GSMS           | Self    | 15        | 572   | 56.00     | 15.496   | 0.57294    | 15.228   | 15,07 - 15,94     | CAPA      | 0.29144   | 0.46211   | 2.51145   | 6.00092    |
| IBG            | Parent  | 8         | 523   | 50.29     | 8.055    | 0.94827    | 8.000    | 7-9               | CBCL      | 5.241     | 28.67748  | 1.65576   | 3.51103    |
| IBG            | Parent  | 11        | 566   | 52.47     | 11.018   | 0.85375    | 11.000   | 10-12             | CBCL      | 5.189     | 27.95181  | 1.81947   | 4.33261    |
| IBG            | Parent  | 14        | 655   | 55.11     | 13.995   | 0.788862   | 14.000   | 13-15             | CBCL      | 5.733     | 42.69456  | 1.99161   | 5.05307    |
| IBG            | Parent  | 16        | 777   | 60.62     | 16.338   | 0.62588021 | 16.000   | 15.5 - 16.5       | CBCL      | 6.409     | 45.70342  | 1.49133   | 2.05593    |
| MoBa           | Mother  | 3         | 5840  | 51.84     | 3.056    | 0.06193275 | 3.033    | 3,019 - 3,085     | CBCL      | 11.090    | 3.55883   | 1.202149  | 4.983507   |
| MoBa           | Mother  | 5         | 4518  | 52.22     | 5.252    | 0.2937818  | 5.083    | 5,000 - 5,417     | CBCL      | 12.720    | 4.044756  | 1.847032  | 7.881518   |
| MoBa           | Mother  | 8         | 4573  | 52.2      | 8.131    | 0.12420899 | 8.083    | 8,083 - 8,167     | SMFQ      | 14.730    | 5.72062   | 2.489333  | 12.25551   |
| MoBa           | Mother  | 8         | 4583  | 52.30     | 8.131    | 0.1241185  | 8.083    | 8,083 - 8,167     | SCARED    | 5.980     | 1.40686   | 1.729183  | 7.699543   |
| MSUTR          | Mother  | 8         | 1015  | 50.25     | 7.850    | 0.89594    | 7.871    | 7.00000 - 8.81918 | CBCL      | 5.459     | 27.59966  | 1.79008   | 4.244109   |
| MUSP           | Mother  | 5         | 1171  | 39.45     | 5.554    | 0.453      | 5.426    | 5,224 - 5,830     | CBCL      | 3.627     | 8.11366   | 0.953477  | 3.61047    |
| MUSP           | Mother  | 14        | 1156  | 39.19     | 13.900   | 0.329      | 13.940   | 13,65 - 14,15     | CBCL      | 3.607     | 8.05470   | 0.950038  | 3.57409    |
| NFBC1986       | Teacher | 8         | 2420  | 48.64     | NA       | NA         | NA       | NA                | Rutter    | 0.629     | 1.42157   | 2.366755  | 9.110403   |
| NFBC1986       | Self    | 16        | 3418  | 47.40     | 16.000   | 0.3719019  | 16.000   | 15.7 - 16.3       | YSR       | 9.561     | 49.94220  | 1.111128  | 4.520208   |
| NTR            | Mother  | 3         | 5069  | 47.49     | 3.350    | 0.27834    | 3.296    | 3,135 - 3,507     | CBCL      | 7.991     | 39.04648  | 1.19362   | 4.77547    |
| NTR            | Mother  | 7         | 4526  | 47.55     | 7.444    | 0.39431    | 7.365    | 7,176 - 7,666     | CBCL      | 4.658     | 23.43077  | 1.99518   | 8.98136    |
| NTR            | Mother  | 10        | 4246  | 47.27     | 9.897    | 0.37040    | 9.927    | 9,725 - 10,144    | CBCL      | 4.901     | 29.15657  | 2.00311   | 8.27543    |
| NTR            | Mother  | 12        | 3651  | 47.38     | 12.000   | 0.51333    | 12.010   | 11,82 - 12,31     | CBCL      | 4.348     | 25.10763  | 2.02469   | 8.24193    |
| NTR            | Father  | 3         | 3713  | 47.40     | 3.389    | 0.27975    | 3.335    | 3,176 - 3,548     | CBCL      | 7.468     | 36.72428  | 1.29937   | 5.27014    |
| NTR            | Father  | 7         | 3735  | 46.88     | 7.446    | 0.39724    | 7.368    | 7,176 - 7,655     | CBCL      | 3.573     | 15.95115  | 2.24832   | 10.69862   |
| NTR            | Father  | 10        | 3471  | 46.66     | 9.903    | 0.37396    | 9.936    | 9,730 - 10,155    | CBCL      | 3.667     | 19.15014  | 2.34145   | 10.97536   |
| NTR            | Father  | 12        | 2978  | 46.31     | 12.000   | 0.50935    | 12.010   | 11,82 - 12,30     | CBCL      | 3.410     | 19.36868  | 2.53214   | 12.27869   |
| NTR            | Teacher | 7         | 1993  | 49.72     | 7.284    | 0.32203    | 7.302    | 7,083 - 7,477     | TRF       | 3.839     | 17.84905  | 1.76685   | 7.08285    |
| NTR            | Teacher | 10        | 2326  | 46.99     | 9.675    | 0.49958    | 9.771    | 9,300 - 10,048    | TRF       | 4.393     | 24.09680  | 1.79059   | 7.03989    |
| NTR            | Teacher | 12        | 2437  | 46.78     | 12.020   | 0.44190    | 12.080   | 11,87 - 12,28     | TRF       | 3.971     | 22.62107  | 2.17336   | 9.30039    |
| NTR            | Self    | 12        | 1206  | 48.09     | 12.200   | 0.42255    | 12.250   | 12,00 - 12,47     | YSR       | 8.498     | 46.70000  | 1.19720   | 4.77875    |
| NTR            | Self    | 14        | 1287  | 43.43     | 14.370   | 0.47265    | 14.440   | 14,18 - 14,73     | YSR       | 8.560     | 45.92619  | 1.25918   | 5.05008    |
| NTR            | Self    | 16        | 1479  | 44.62     | 16.480   | 0.45441    | 16.600   | 16,31 - 16,80     | YSR       | 8.857     | 50.78999  | 1.41196   | 5.89004    |
| NTR            | Self    | 18        | 1455  | 40.07     | 17.820   | 0.55440    | 17.840   | 17,29 - 18,26     | YSR       | 9.254     | 52.81941  | 1.23214   | 4.87133    |
| PNC            | Parent  | 8 to 10   | 1059  | 0.5741265 | 8.924    | 0.832899   | 9.000    | 8-10              | GOASSESS  | 0.3267233 | 0.7494837 | 2.942433  | 8.195316   |
| PNC            | Self    | 11 to 13  | 966   | 0.515528  | 12.04141 | 0.8004815  | 12.000   | 11-13             | GOASSESS  | 0.7546584 | 1.341818  | 1.473427  | 1.094241   |
| PNC            | Self    | 14 to 16  | 1104  | 0.4773551 | 15.03804 | 0.804792   | 15.000   | 14-16             | GOASSESS  | 1.1       |           |           |            |

|        |         |         |      |       |          |          |          |               |        |         |           |           |            |
|--------|---------|---------|------|-------|----------|----------|----------|---------------|--------|---------|-----------|-----------|------------|
| TEDS   | Parent  | 7       | 5579 | 47.89 | 7.060    | 0.25059  | 7.04     | 5.57-8.62     | SDQ    | 1.81657 | 3.29992   | 1.0714    | 1.16339    |
| TEDS   | Parent  | 9       | 2673 | 46.19 | 9.020    | 0.28927  | 9        | 8.08-11.34    | SDQ    | 1.693   | 3.30000   | 1.345812  | 1.638      |
| TEDS   | Parent  | 12      | 4644 | 47.15 | 11.28    | 7.02E-01 | 11.440   | 9.79-15.62    | SDQ    | 1.776   | 3.65000   | 1.311     | 1.616      |
| TEDS   | Teacher | 7       | 4586 | 48.36 | 7.20026  | 2.76E-01 | 7.22793  | 6.57-8.03     | SDQ    | 1.302   | 3.15700   | 1.688521  | 2.954878   |
| TEDS   | Teacher | 9       | 2224 | 46.33 | 9.0334   | 2.88E-01 | 9.01437  | 8.46-10.14    | SDQ    | 1.313   | 3.35800   | 1.705     | 2.837      |
| TEDS   | Teacher | 12      | 3836 | 46.63 | 11.53216 | 6.62E-01 | 11.6386  | 10.12-14.09   | SDQ    | 1.190   | 3.15200   | 1.921     | 3.924      |
| TEDS   | Self    | 9       | 2633 | 53.80 | 9.01695  | 2.89E-01 | 9.00205  | 8.08-11.34    | SDQ    | 3.223   | 5.62560   | 0.607126  | -0.260724  |
| TEDS   | Self    | 12      | 4631 | 53.14 | 11.2758  | 6.98E-01 | 11.436   | 9.79-15.62    | SDQ    | 2.1903  | 4.35762   | 1.020176  | 0.634684   |
| TEDS   | Self    | 16      | 3999 | 55.82 | 16.32395 | 6.80E-01 | 16.47912 | 14.91-18.76   | SDQ    | 2.779   | 5.10625   | 0.737382  | -0.037459  |
| TRAILS | Mother  | 11      | 1532 | 51.70 | 11.079   | 0.53669  | 11.003   | 10.671-11.418 | CBCL   | 9.059   | 50.01353  | 1.16473   | 4.38332    |
| TRAILS | Mother  | 13      | 1411 | 50.67 | 13.356   | 0.60722  | 13.383   | 12.945-13.789 | CBCL   | 7.318   | 41.93058  | 1.33158   | 5.11779    |
| TRAILS | Mother  | 16      | 1324 | 51.59 | 16.113   | 0.65172  | 16.048   | 15.655-16.469 | CBCL   | 7.031   | 46.41703  | 1.43196   | 5.15202    |
| TRAILS | Teacher | 11      | 1487 | 51.31 | 11.050   | 0.52553  | 10.962   | 10.667-11.369 | TRF    | 11.909  | 160.09741 | 1.08153   | 3.73831    |
| TRAILS | Teacher | 13      | 1282 | 52.42 | 13.317   | 0.61234  | 13.329   | 12.893-13.762 | TRF    | 14.460  | 190.46251 | 1.08639   | 3.99189    |
| TRAILS | Teacher | 16      | 1017 | 53.20 | 15.991   | 0.5836   | 15.959   | 15.592-16.337 | TRF    | 15.479  | 186.42500 | 1.00975   | 3.9256     |
| TRAILS | Self    | 11      | 1663 | 51.89 | 11.088   | 0.54219  | 11.006   | 10.68-11.443  | YSR    | 11.769  | 53.78058  | 0.72384   | 3.11163    |
| TRAILS | Self    | 13      | 1661 | 51.90 | 13.373   | 0.60644  | 13.385   | 12.975-13.818 | YSR    | 10.645  | 56.31695  | 0.96509   | 4.00263    |
| TRAILS | Self    | 16      | 1610 | 51.49 | 16.138   | 0.66922  | 16.055   | 15.671-16.492 | YSR    | 9.839   | 59.55625  | 1.09756   | 4.27731    |
| VTSABD | Parent  | 13      | 549  | 40.53 | 13.911   | 0.73339  | 14.081   | 12,827-14,995 | CAPA   | 1.180   | 1.67363   | 1.01644   | 0.26936    |
| VTSABD | Parent  | 13      | 552  | 40.53 | 13.911   | 0.73339  | 14.081   | 12,827-14,995 | Rutter | 2.246   | 3.91378   | 0.9917718 | 0.65124435 |
| VTSABD | Parent  | 16      | 569  | 42.60 | 16.088   | 0.5376   | 16.194   | 15,318-17,071 | CAPA   | 1.218   | 1.90665   | 1.08184   | 0.3586938  |
| VTSABD | Parent  | 16      | 590  | 42.60 | 16.088   | 0.5376   | 16.194   | 15,318-17,071 | Rutter | 2.020   | 3.98261   | 1.03160   | 0.63672412 |
| VTSABD | Self    | 13      | 547  | 40.53 | 13.911   | 0.73339  | 14.081   | 12,827-14,995 | CAPA   | 0.985   | 1.47231   | 1.29986   | 1.13579    |
| VTSABD | Self    | 13      | 553  | 40.53 | 13.911   | 0.73339  | 14.081   | 12,827-14,995 | MA     | 2.022   | 3.03214   | 0.8736504 | 0.34390084 |
| VTSABD | Self    | 16      | 579  | 42.60 | 16.088   | 0.5376   | 16.194   | 15,318-17,071 | CAPA   | 1.425   | 2.10637   | 0.80402   | -0.3716444 |
| VTSABD | Self    | 16      | 577  | 42.60 | 16.088   | 0.5376   | 16.194   | 15,318-17,071 | MA     | 2.005   | 3.11629   | 0.89654   | 0.46710943 |
| YFS    | Mother  | 6 to 21 | 1608 | 45.4  | 13.53731 | 5.03786  | 15       | 9-18          | YFS    | 0.00317 | 0.93103   | 0.22778   | 16.51297   |

Cohort= DIL: Diabetes and Inflammation Laboratory, WTCCC: Welcome Trust Case Control Consortium, W1: Wave 1, W2: Wave 2

Phenotype= BSAG: Bristol Social Adjustment Guides, CAPA: Child and Adolescent Psychiatric Assessment, CBCL: Child Behavior Checklist, CES-D: Center for Epidemiological Studies Depression Scale, MA: Children's Manifest Anxiety Scale, MPNI: Multidimensional Peer Nomination Inventory, SDQ: Strengths and Difficulties Questionnaire, SCARED: Screen for Anxiety Related Disorders, SMFQ: Short Mood and Feelings Questionnaire, TRF: Teacher Report Form, YFS: Young Finns Study, YSR: Youth Self Report

**Table S5** Overview of genotyping, quality control, and imputation  
MAF = minor allele frequency; HWE = Hardy-Weinberg Equilibrium; SD = standard deviations

| Cohort       | Array(s)                                                                                                                                                                                                          | Pre-imputation quality control |      |             |                                                                                                                                                                     |                |                                                          | Imputation                                                    |                                          |                 |
|--------------|-------------------------------------------------------------------------------------------------------------------------------------------------------------------------------------------------------------------|--------------------------------|------|-------------|---------------------------------------------------------------------------------------------------------------------------------------------------------------------|----------------|----------------------------------------------------------|---------------------------------------------------------------|------------------------------------------|-----------------|
|              |                                                                                                                                                                                                                   | Variant filters                |      |             |                                                                                                                                                                     | Sample filters |                                                          | Reference panel                                               | Software                                 |                 |
|              |                                                                                                                                                                                                                   | Call rate                      | MAF  | HWE P-value | Other                                                                                                                                                               | Call rate      | Heterozygosity                                           |                                                               |                                          | Other           |
| 1958BC       | Illumina HumanHap 550<br>Illumina Human 1M<br>Affymetrix 6.0                                                                                                                                                      | 95%                            | 0.01 | 1E-06       |                                                                                                                                                                     | 95%            | +/- 4 SD from mean                                       | relatedness, failed sex check                                 | 1000 Genomes Phase 1 Version 3, global   | IMPUTE v2       |
| ABCD         | Affymetrix NIDA SmokeScreen Array                                                                                                                                                                                 | 95%                            | 0.01 | 1E-06       |                                                                                                                                                                     | 95%            | 0,45 < F < 0,45                                          | cryptic relatedness ( $\pi > 0,2$ ), failed sex check         | 1000 Genomes Phase 3 Version 5, European | Minimac 4       |
| Add Health   | Illumina HumanOmni1<br>Illumina HumanOmni2.5                                                                                                                                                                      | 98%                            | 0.05 | 1E-06       |                                                                                                                                                                     | 95%            | median + 3*IQR                                           | gender mismatch, duplicates, relatedness                      | 1000 Genomes Phase 1 Version 3, global   | Minimac3 / MACH |
| ALSPAC       | Illumina Human Hap 550-quad                                                                                                                                                                                       | 99%                            | 0.01 | 5E-07       |                                                                                                                                                                     | 97%            | 0,0375 < F < 0,27                                        | relatedness, duplicates                                       | 1000 Genomes Phase 1 Version 3, global   | IMPUTE v2       |
| BREATHE      | Illumina HumanCoreBeadChip WG-330-1101                                                                                                                                                                            | 95%                            | 0.01 | 1E-06       | LRR SD < 0,3                                                                                                                                                        | 97%            | +/- 4 SD from mean                                       | relatedness                                                   | 1000 Genomes Phase 1 Version 3, European | IMPUTE v2       |
| CATSS        | Illumina PsychArray<br>-Infimium Core-24 BeadChip (265,000 markers)<br>-Infimium Exome-24 BeadChip (245,000 markers)<br>-50,000 markers associated with common psychiatric disorders                              | 98%                            | 0.01 | 1E-06       | >10% discordant genotypes among cross-batch duplicates samples; discordant genotype among MZ twins; absolute allele frequency difference >10% compared to 1000G EUR | 98%            | -0,2 < F < 0,2                                           | +/- 6 SD from mean of average sample relatedness              | 1000 Genomes Phase 3 Version 5, European | Minimac3 / MACH |
| FinnTwin12   | CCC: Illumina Human670-QuadCustom v1 A<br>FTALCO: Illumina Human670-QuadCustom v1 A<br>FI: Illumina HumanCoreExome-12 v1.1 A<br>gtmp: Illumina HumanCoreExome-12 v1.0 A<br>KAP: Illumina HumanCoreExome-24 v1.0 A | 98%                            | 0.01 | 1E-06       |                                                                                                                                                                     | 97%            | +/- 3 SD from mean; +/- 4 SD from mean; -0,03 < F < 0,05 |                                                               | 1000 Genomes Phase 3 Version 5, global   | Minimac3 / MACH |
| Gen-R        | Illumina 610K Quad Chip (cord blood at birth)                                                                                                                                                                     | 95%                            | 0.01 | 1E-07       |                                                                                                                                                                     | 97.5%          | +/- 4 SD from mean                                       | relatedness, duplicates                                       | 1000 Genomes Phase 3 Version 5, European | MACH            |
| GINplus/LISA | Illumina 660K Quad Chip (venous blood at follow-up collection)                                                                                                                                                    | 95%                            | 0.01 | 1E-05       |                                                                                                                                                                     | 95%            | +/- 4 SD from mean                                       |                                                               | 1000 Genomes Phase 3 Version 5, European | IMPUTE v2       |
| GSMS         | Affymetrix 6.0<br>Illumina Human660W-Quad v1                                                                                                                                                                      | 95%                            | 0.01 | 1E-08       | strand ambiguity                                                                                                                                                    | 90%            | +/- 5 SD from mean                                       | relatedness                                                   | 1000 Genomes Phase 3 Version 5, European | IMPUTE v2       |
| IBG          | Axiom Precision Medicine Research Array<br>Affymetrix Genome-Wide Human SNP Array 6.0                                                                                                                             | 95%                            | 0.01 | NA          |                                                                                                                                                                     | 99%            | NA                                                       |                                                               | 1000 Genomes Phase 3 Version 5, European | Minimac3 / MACH |
| MoBa         | Illumina HumanCoreExome-12<br>Illumina HumanCoreExome-24                                                                                                                                                          | 98%                            | 0.01 | 1E-07       |                                                                                                                                                                     | 98%            | +/- 4 SD from mean                                       | cryptic relatedness ( $\pi > 0,1$ ), sex mismatch             | 1000 Genomes Phase 3 Version 5, global   | IMPUTE v2       |
| MSUTR        | Illumina HumanCoreExome                                                                                                                                                                                           | 99%                            | 0.05 | 1E-06       |                                                                                                                                                                     | 95%            | -0,2 < F < 0,2                                           |                                                               | 1000 Genomes Phase 3 Version 5, European | Minimac3 / MACH |
| MUSP         | PsychChip v1.0                                                                                                                                                                                                    | 95%                            | 0.01 | 1E-06       | strand ambiguity                                                                                                                                                    | 95%            | Y                                                        | relatedness ( $\pi > 0,2$ )                                   | 1000 Genomes Phase 3 Version 5, European | Minimac3 / MACH |
| NFBC1986     | Illumina HumanOmniExpressExome-8v1.2                                                                                                                                                                              | 99%                            | NA   | 0.0001      |                                                                                                                                                                     | 95%            | Y                                                        | relatedness ( $\pi > 0,2$ )                                   | 1000 Genomes Phase 3 Version 5, European | IMPUTE          |
| NTR          | Perlegen Affymetrix<br>Affymetrix 6.0<br>Affymetrix Axiom<br>Illumina 660<br>Illumina 1M<br>Illumina GSA<br>GoNL sequence                                                                                         | 95%                            | 0.01 | 1E-05       | strand ambiguity; number of Mendelian errors > 20; +/- 3 SD from mean Mendelian error rate                                                                          | 90%            | -0,1 < F < 0,1                                           |                                                               | 1000 Genomes Phase 3 Version 5, European | Minimac3 / MACH |
| PNC          | Human1M-Duov3_B<br>HumanOmniExpressExome-8v1_A<br>HumanOmniExpress-12v1_A<br>HumanOmniExpress-12v1-1_B<br>HumanE10-Quadv1_B<br>BDCHP-1X10-HUMANHAP550<br>HumanHap550v3_A                                          | 98%                            | NA   | NA          |                                                                                                                                                                     | 98%            | NA                                                       | failed sex check, relatedness                                 | 1000 Genomes Phase 3 Version 5           | Minimac3 / MACH |
| Raine Study  | Illumina Human 660W Quad Array                                                                                                                                                                                    | 95%                            | 0.01 | 1E-06       | strand ambiguity                                                                                                                                                    | 95%            | h>0,32                                                   | cryptic relatedness ( $\pi \geq 0,1875$ )                     | 1000 Genomes Phase 3 Version 5, European | Minimac3 / MACH |
| TEDS         | Illumina HumanOmniExpressExome-8v1.2<br>AffymetrixGeneChip 6.0 SNP                                                                                                                                                | 98%                            | 0.01 | 1E-05       |                                                                                                                                                                     | 98%            | -0,1 < F < 0,1                                           | relatedness (KING kinship coefficient < 0,0884 [ $r=-0,25$ ]) | 1000 Genomes Phase 3 Version 5, European | MACH            |
| TRAILS       | Illumina Cyto SNP12 v2 + TaqMan                                                                                                                                                                                   | 95%                            | 0.01 | 0.0001      |                                                                                                                                                                     | 95%            | +/- 4 SD from mean                                       | relatedness ( $\pi > 0,35$ )                                  | 1000 Genomes Phase 1 Version 3, European | IMPUTE v2       |
| VTSABD       | Illumina Human660W-Quad v1                                                                                                                                                                                        | 95%                            | 0.01 | 1E-08       | strand ambiguity                                                                                                                                                    | 90%            | +/- 5 SD from mean                                       | relatedness                                                   | 1000 Genomes Phase 3 Version 5, European | IMPUTE v2       |
| YFS          | Illumina BeadChip Human670K                                                                                                                                                                                       | 95%                            | 0.01 | 1E-06       |                                                                                                                                                                     | 95%            | Y                                                        | relatedness ( $\pi > 0,2$ )                                   | 1000 Genomes Phase 1 Version 3, global   | IMPUTE          |

**Table S6** Cohort-specific covariates

PCs = principal components; GRM = genetic relatedness matrix

| Cohort        | Covariates                                                        |
|---------------|-------------------------------------------------------------------|
| 1958BC        | sex, site, first five ancestry-based PCs                          |
| ABCD          | sex, age, batch, first five ancestry-based PCs                    |
| Add Health    | sex, age, first five ancestry-based PCs                           |
| ALSPAC        | sex, age, first five ancestry-based PCs                           |
| BREATHE       | sex, age, first five ancestry-based PCs                           |
| CATSS         | sex, first five ancestry-based PCs                                |
| FinnTwin12    | sex, age, kinship matrix                                          |
| Gen-R         | sex, age, first five ancestry-based PCs                           |
| GINIplus/LISA | sex, age, study                                                   |
| GSMS          | age, sex, first five ancestry-based PCs                           |
| IBG           | age, sex, site, first five ancestry-based PCs                     |
| MoBa          | sex, age, batch (when required), first five ancestry-based PCs    |
| MSUTR         | sex, age, first five ancestry-based PCs, GRM                      |
| MUSP          | sex, age, first ten ancestry-based PCs                            |
| NFBC1986      | sex, age, first four MDS dimensions                               |
| NTR           | age, sex, genotyping array, first five ancestry-based PCs, 2 GRMs |
| PNC           | sex, age, first five ancestry-based PCs                           |
| Raine Study   | sex, age, first five ancestry-based PCs                           |
| TEDS          | sex, age, first five ancestry-based PCs                           |
| TRAILS        | sex, age, first five ancestry-based PCs                           |
| VTSABD        | sex, age, first five ancestry-based PCs, GRMs                     |
| YFS           | sex, age, first five ancestry-based PCs                           |



**Table S7** Number of SNPs before and after EasyQC, per GWAS

| Cohort       | Rater   | Mean age<br>(rounded) | Sub-analysis    | Number of SNPs |          |
|--------------|---------|-----------------------|-----------------|----------------|----------|
|              |         |                       |                 | before QC      | after QC |
| 1958BC       | Teacher | 7                     | Study 1         | 38045094       | 4952213  |
| 1958BC       | Teacher | 11                    | Study 1         | 38045094       | 4952213  |
| 1958BC       | Teacher | 16                    | Study 1         | 38045094       | 4421770  |
| 1958BC       | Mother  | 7                     | Study 1         | 38045094       | 4952213  |
| 1958BC       | Mother  | 11                    | Study 1         | 38045094       | 4926068  |
| 1958BC       | Mother  | 16                    | Study 1         | 38045094       | 4421770  |
| 1958BC       | Teacher | 7                     | Study 2         | 38047659       | 5396498  |
| 1958BC       | Teacher | 11                    | Study 2         | 38047659       | 5396498  |
| 1958BC       | Teacher | 16                    | Study 2         | 38047659       | 5326787  |
| 1958BC       | Mother  | 7                     | Study 2         | 38047659       | 5396498  |
| 1958BC       | Mother  | 11                    | Study 2         | 38047659       | 5396498  |
| 1958BC       | Mother  | 16                    | Study 2         | 38047659       | 4812206  |
| ABCD         | Parent  | 9                     |                 | 47098604       | 4648812  |
| ABCD         | Parent  | 12                    |                 | 47098604       | 4137718  |
| Add Health   | Self    | 12                    | Wave 1          | 42536462       | 3736021  |
| Add Health   | Self    | 15                    | Wave 1          | 42965354       | 5657465  |
| Add Health   | Self    | 17                    | Wave 1          | 42833772       | 4894482  |
| Add Health   | Self    | 15                    | Wave 2          | 42917514       | 5657465  |
| Add Health   | Self    | 17                    | Wave 2          | 42792834       | 4894482  |
| ALSPAC       | Teacher | 7                     |                 | 27178589       | 5831802  |
| ALSPAC       | Teacher | 10                    |                 | 27178600       | 5833981  |
| ALSPAC       | Mother  | 115m                  |                 | 27178649       | 7136691  |
| ALSPAC       | Mother  | 140m                  |                 | 27178634       | 5833291  |
| ALSPAC       | Mother  | 157m                  |                 | 27178619       | 5833455  |
| ALSPAC       | Mother  | 198m                  |                 | 27178596       | 5832509  |
| ALSPAC       | Mother  | 47m                   |                 | 27178676       | 7137279  |
| ALSPAC       | Mother  | 81m                   |                 | 27178657       | 7137189  |
| ALSPAC       | Mother  | 97m                   |                 | 27178656       | 7136804  |
| BREATHE      | Parent  | 8                     |                 | 37759387       | 5093532  |
| CATSS        | Father  | 15                    |                 | 12938273       | 5140498  |
| CATSS        | Mother  | 15                    |                 | 12938273       | 6909050  |
| CATSS        | Self    | 15                    |                 | 12938273       | 6911168  |
| FinnTwin12   | Co-twin | 14                    |                 | 47075775       | 4210866  |
| FinnTwin12   | Co-twin | 17                    |                 | 47075775       | 5293702  |
| FinnTwin12   | Parent  | 12                    |                 | 47075775       | 5294080  |
| FinnTwin12   | Self    | 14                    |                 | 47075775       | 4210574  |
| FinnTwin12   | Self    | 17                    |                 | 47075775       | 5294345  |
| FinnTwin12   | Teacher | 12                    |                 | 47075775       | 5293238  |
| FinnTwin12   | Teacher | 14                    |                 | 47075775       | 4211117  |
| Gen-R        | Teacher | 7                     |                 | 34349995       | 4142231  |
| Gen-R        | Father  | 10                    |                 | 28856182       | 5032040  |
| Gen-R        | Mother  | 10                    |                 | 28856182       | 5031920  |
| Gen-R        | Father  | 3                     |                 | 28856182       | 5031971  |
| Gen-R        | Mother  | 3                     |                 | 28856182       | 5031898  |
| GINplus/LISA | Parent  | 10                    |                 | 30056331       | 5025912  |
| GINplus/LISA | Self    | 15                    |                 | 30056331       | 5025047  |
| GSMS         | Self    | 13                    |                 | 6838237        | 3685008  |
| GSMS         | Self    | 16                    |                 | 6748337        | 3645420  |
| GSMS         | Parent  | 13                    |                 | 6310658        | 3401135  |
| GSMS         | Parent  | 13                    |                 | 6748337        | 3645420  |
| IBG          | Parent  | 8                     |                 | 8200256        | 3986519  |
| IBG          | Parent  | 11                    |                 | 8199955        | 3695992  |
| IBG          | Parent  | 14                    |                 | 8198247        | 3745317  |
| IBG          | Parent  | 16                    |                 | 8888183        | 3418656  |
| MoBa         | Mother  | 3                     | Chip 1          | 39131578       | 6022644  |
| MoBa         | Mother  | 5                     | Chip 1          | 39131578       | 6025308  |
| MoBa         | Mother  | 8                     | Chip 1, SMFQ*   | 39131578       | 6025498  |
| MoBa         | Mother  | 8                     | Chip 1, SCARED* | 39131578       | 6025367  |
| MoBa         | Mother  | 3                     | Chip 2          | 39131578       | 6028506  |
| MoBa         | Mother  | 5                     | Chip 2          | 39131578       | 5333152  |
| MoBa         | Mother  | 8                     | Chip 2, SMFQ*   | 39131578       | 5329251  |

|             |         |      |                 |          |         |
|-------------|---------|------|-----------------|----------|---------|
| MoBa        | Mother  | 8    | Chip 2, SCARED* | 39131578 | 5329051 |
| MSUTR       | Mother  | 8    |                 | 18529974 | 5013388 |
| MUSP        | Mother  | 5    |                 | 47099760 | 4918217 |
| MUSP        | Mother  | 14   |                 | 47099760 | 4917032 |
| NFBC1986    | Self    | 16   |                 | 12796984 | 6177075 |
| NFBC1986    | Teacher | 8    |                 | 12402368 | 6177066 |
| NTR         | Mother  | 3    |                 | 4934427  | 4594974 |
| NTR         | Mother  | 7    |                 | 4933175  | 4593844 |
| NTR         | Mother  | 10   |                 | 4935567  | 4595911 |
| NTR         | Mother  | 12   |                 | 4935518  | 4595850 |
| NTR         | Father  | 2    |                 | 4933964  | 4594618 |
| NTR         | Father  | 7    |                 | 4933103  | 4593685 |
| NTR         | Father  | 10   |                 | 4934823  | 4595272 |
| NTR         | Father  | 12   |                 | 4936227  | 4596581 |
| NTR         | Teacher | 7    |                 | 4423617  | 4112565 |
| NTR         | Teacher | 10   |                 | 4935834  | 4596230 |
| NTR         | Teacher | 12   |                 | 4936782  | 4597092 |
| NTR         | Self    | 12   |                 | 4433962  | 4122188 |
| NTR         | Self    | 14   |                 | 4427483  | 4116135 |
| NTR         | Self    | 16   |                 | 4422899  | 4111933 |
| NTR         | Self    | 18   |                 | 4427575  | 4116154 |
| PNC         | Parent  | 9    |                 | 42963164 | 2557981 |
| PNC         | Self    | 12   |                 | 42961641 | 1849605 |
| PNC         | Self    | 15   |                 | 42964071 | 2557981 |
| Raine Study | Parent  | 10   |                 | 48096953 | 5168223 |
| Raine Study | Self    | 13   |                 | 48096953 | 5168223 |
| Raine Study | Parent  | 5    |                 | 48096953 | 5168223 |
| Raine Study | Parent  | 8    |                 | 48096953 | 5168223 |
| TEDS        | Parent  | 7    | Chip 1          | 9220773  | 5562040 |
| TEDS        | Parent  | 9    | Chip 1          | 9220773  | 4957940 |
| TEDS        | Parent  | 12   | Chip 1          | 9220773  | 4957940 |
| TEDS        | Teacher | 7    | Chip 1          | 9220773  | 4957940 |
| TEDS        | Teacher | 9    | Chip 1          | 9220773  | 3968868 |
| TEDS        | Teacher | 12   | Chip 1          | 9220773  | 4957940 |
| TEDS        | Self    | 9    | Chip 1          | 9220773  | 4957940 |
| TEDS        | Self    | 12   | Chip 1          | 9220773  | 4957940 |
| TEDS        | Self    | 16   | Chip 1          | 9220773  | 4957940 |
| TEDS        | Parent  | 7    | Chip 2          | 9264517  | 5663362 |
| TEDS        | Parent  | 9    | Chip 2          | 9264517  | 5035667 |
| TEDS        | Parent  | 12   | Chip 2          | 9264517  | 5663362 |
| TEDS        | Teacher | 7    | Chip 2          | 9264517  | 5663362 |
| TEDS        | Teacher | 9    | Chip 2          | 9264517  | 5035667 |
| TEDS        | Teacher | 12   | Chip 2          | 9264517  | 5663362 |
| TEDS        | Self    | 9    | Chip 2          | 9264517  | 5035667 |
| TEDS        | Self    | 12   | Chip 2          | 9264517  | 5663362 |
| TEDS        | Self    | 16   | Chip 2          | 9264517  | 5663362 |
| TRAILS      | Self    | 11   |                 | 47100222 | 5024277 |
| TRAILS      | Self    | 13   |                 | 47100222 | 5023520 |
| TRAILS      | Self    | 16   |                 | 47100222 | 5022025 |
| TRAILS      | Mother  | 11   |                 | 47100222 | 5022242 |
| TRAILS      | Mother  | 13   |                 | 47100222 | 5023877 |
| TRAILS      | Mother  | 16   |                 | 47100222 | 5021904 |
| TRAILS      | Teacher | 11   |                 | 47100222 | 5023980 |
| TRAILS      | Teacher | 13   |                 | 47100222 | 4051171 |
| TRAILS      | Teacher | 16   |                 | 47100222 | 4059150 |
| VTSABD      | Self    | 13   | CAPA*           | 7991599  | 4080551 |
| VTSABD      | Self    | 16   | CAPA*           | 7724021  | 3950632 |
| VTSABD      | Self    | 13   | MA*             | 7950086  | 4080551 |
| VTSABD      | Self    | 16   | MA*             | 7972919  | 4080551 |
| VTSABD      | Parent  | 13   | CAPA*           | 7993832  | 4080551 |
| VTSABD      | Parent  | 16   | CAPA*           | 7960825  | 4080551 |
| VTSABD      | Parent  | 13   | Rutter*         | 7953270  | 4080551 |
| VTSABD      | Parent  | 16   | Rutter*         | 7988403  | 4080551 |
| YFS         | Mother  | wide |                 | 15077966 | 5128429 |

\* = measurement instrument (described in detail in Supplementary Table 3)

**Table S8** Stratified analyses of internalising symptoms

N = number; N<sub>unique</sub> = number of unique individuals; N<sub>obs</sub> = total number of observations; N<sub>eff</sub> = effective sample size; h<sup>2</sup> = SNP-based heritability; SE = standard error, CI = confidence interval

| Category     | Meta-analysis           | Age range |     | N       |       |                     |                  | LDSC-statistics  |                |        |          |          |         |           |        |
|--------------|-------------------------|-----------|-----|---------|-------|---------------------|------------------|------------------|----------------|--------|----------|----------|---------|-----------|--------|
|              |                         | min       | max | Cohorts | GWASs | N <sub>unique</sub> | N <sub>obs</sub> | N <sub>eff</sub> | h <sup>2</sup> | SE     | Lower CI | Upper CI | Z       | Intercept | SE     |
| Overall      | INToverall              | 3         | 18  | 22      | 125   | 64641               | 251152           | 132260           | 0.0166         | 0.0042 | 0.0084   | 0.0248   | 3.9524  | 1.0426    | 0.0075 |
| Rater        | Parent                  | 3         | 18  | 20      | 69    | 50612               | 153856           | 82208            | 0.0172         | 0.0062 | 0.005    | 0.0294   | 2.7742  | 1.0373    | 0.0062 |
|              | Mother                  | 3         | 16  | 10      | 35    | 34047               | 102194           | 56343            | 0.0256         | 0.0089 | 0.0082   | 0.043    | 2.8764  | 1.0452    | 0.0075 |
|              | Father                  | 3         | 15  | 3       | 7     | 6323                | 17043            | 10494            | 0.0898         | 0.0461 | -0.0006  | 0.1802   | 1.9479  | 0.9834    | 0.0078 |
|              | Teacher                 | 7         | 16  | 8       | 23    | 22001               | 45944            | 37208            | 0.0365         | 0.013  | 0.011    | 0.062    | 2.8077  | 1.009     | 0.0075 |
|              | Self                    | 9         | 16  | 11      | 31    | 29122               | 49366            | 37853            | 0.0563         | 0.013  | 0.0308   | 0.0818   | 4.3308  | 0.993     | 0.007  |
| Age          | Early childhood         | 3         | 6   | 6       | 13    | 21049               | 37870            | 27599            | 0.0093         | 0.0169 | -0.0238  | 0.0424   | 0.5503  | 1.0082    | 0.0065 |
|              | Mid-childhood           | 7         | 10  | 14      | 40    | 37296               | 90291            | 62630            | 0.0138         | 0.0076 | -0.0011  | 0.0287   | 1.8158  | 1.0209    | 0.0076 |
|              | Late childhood          | 11        | 12  | 10      | 24    | 23311               | 46120            | 35162            | 0.0064         | 0.0145 | -0.022   | 0.0348   | 0.4414  | 1.0263    | 0.0071 |
|              | Adolescence             | 13        | 18  | 16      | 47    | 33201               | 75263            | 58502            | 0.0197         | 0.0085 | 0.003    | 0.0364   | 2.3176  | 1.0638    | 0.0068 |
| Rater-by-age | Parent, early childhood | 3         | 6   | 6       | 13    | 21049               | 37870            | 28724            | 0.0157         | 0.0177 | -0.019   | 0.0504   | 0.887   | 1.0061    | 0.0068 |
|              | Parent, mid-childhood   | 7         | 10  | 13      | 26    | 34734               | 60654            | 43511            | 0.0206         | 0.0108 | -0.0006  | 0.0418   | 1.9074  | 1.0107    | 0.0066 |
|              | Parent, late-childhood  | 11        | 12  | 8       | 11    | 21383               | 23982            | 21950            | -0.0182        | 0.0214 | -0.0601  | 0.0237   | -0.8505 | 1.0203    | 0.007  |
|              | Parent, adolescence     | 13        | 16  | 9       | 18    | 20623               | 29742            | 25182            | 0.0269         | 0.0199 | -0.0121  | 0.0659   | 1.3518  | 1.0339    | 0.0068 |
|              | Mother, early childhood | 3         | 6   | 5       | 9     | 19401               | 29219            | 24061            | 0.0049         | 0.0195 | -0.0333  | 0.0431   | 0.2513  | 2.008     | 0.0075 |
|              | Mother, mid-childhood   | 7         | 10  | 7       | 10    | 21270               | 35046            | 27337            | 0.0314         | 0.0167 | -0.0013  | 0.0641   | 1.8802  | 1.0086    | 0.0071 |
|              | Mother, adolescence     | 13        | 16  | 5       | 8     | 16315               | 21094            | 19700            | 0.0154         | 0.0259 | -0.0354  | 0.0662   | 0.5946  | 1.051     | 0.0074 |
|              | Teacher, mid-childhood  | 7         | 10  | 7       | 10    | 19317               | 27001            | 24766            | 0.0241         | 0.0192 | -0.0135  | 0.0617   | 1.2552  | 1.0161    | 0.0069 |
|              | Self, adolescence       | 13        | 18  | 11      | 23    | 26777               | 37573            | 31496            | 0.032          | 0.0146 | 0.0034   | 0.0606   | 2.1918  | 0.9981    | 0.0068 |
|              | Instrument              | ASEBA     | 3   | 18      | 10    | 47                  | 25892            | 91093            | 43442          | 0.0311 | 0.013    | 0.0056   | 0.0566  | 2.3923    | 1.0068 |
| SDQ          |                         | 3         | 16  | 5       | 33    | 21396               | 96010            | 50880            | 0.0262         | 0.0116 | 0.0035   | 0.0489   | 2.2586  | 1.0861    | 0.0086 |
| Rutter       |                         | 7         | 16  | 3       | 11    | 7654                | 20562            | 13997            | 0.0037         | 0.0336 | -0.0622  | 0.0696   | 0.1101  | 0.9912    | 0.0068 |

**Table S9** List of external phenotypes for genetic correlations

| Domain          | Trait                                           | Child/Adult/Both | Paper           | Digital object identifier (doi)                                                                     | Source                                                                                                                                                                                                                                                                                                                                    |
|-----------------|-------------------------------------------------|------------------|-----------------|-----------------------------------------------------------------------------------------------------|-------------------------------------------------------------------------------------------------------------------------------------------------------------------------------------------------------------------------------------------------------------------------------------------------------------------------------------------|
| Psychiatry      | Anorexia Nervosa                                | Both             | Watson, 2019    | <a href="https://doi.org/10.1038/s41588-019-0439-2">https://doi.org/10.1038/s41588-019-0439-2</a>   | <a href="https://www.med.unc.edu/pgc/download-results/ed/">https://www.med.unc.edu/pgc/download-results/ed/</a>                                                                                                                                                                                                                           |
| Psychiatry      | Anxiety                                         | Adult            | Purves, 2019    | <a href="https://doi.org/10.1038/s41380-019-0559-1">https://doi.org/10.1038/s41380-019-0559-1</a>   | Authors                                                                                                                                                                                                                                                                                                                                   |
| Psychiatry      | Attention deficit hyperactivity disorder (ADHD) | Both             | Demontis, 2019  | <a href="https://doi.org/10.1038/s41588-018-0269-7">https://doi.org/10.1038/s41588-018-0269-7</a>   | <a href="https://ipsych.dk/en/research/downloads/">https://ipsych.dk/en/research/downloads/</a>                                                                                                                                                                                                                                           |
| Psychiatry      | Autism spectrum disorder                        | Both             | Grove, 2019     | <a href="https://doi.org/10.1038/s41588-019-0344-6">https://doi.org/10.1038/s41588-019-0344-6</a>   | <a href="https://www.med.unc.edu/pgc/results-and-downloads/">https://www.med.unc.edu/pgc/results-and-downloads/</a>                                                                                                                                                                                                                       |
| Psychiatry      | Bipolar disorder                                | Adult            | Stahl, 2018     | <a href="https://doi.org/10.1101/173062">https://doi.org/10.1101/173062</a>                         | <a href="https://www.med.unc.edu/pgc/results-and-downloads/">https://www.med.unc.edu/pgc/results-and-downloads/</a>                                                                                                                                                                                                                       |
| Psychiatry      | Depressive symptoms                             | Adult            | Baselmans, 2019 | <a href="https://doi.org/10.1038/s41588-018-0320-8">https://doi.org/10.1038/s41588-018-0320-8</a>   | <a href="https://surfdrive.surf.nl/files/index.php/s/Ow1qCDpFT421Z00/download?path=%2FMultivariate_GWAMA_sumstats%2FMA_GWAMA&amp;files=MA_DEPno23andMe_18022020.txt.gz">https://surfdrive.surf.nl/files/index.php/s/Ow1qCDpFT421Z00/download?path=%2FMultivariate_GWAMA_sumstats%2FMA_GWAMA&amp;files=MA_DEPno23andMe_18022020.txt.gz</a> |
| Psychiatry      | Major depressive disorder                       | Adult            | Howard, 2019    | <a href="https://doi.org/10.1038/s41593-018-0326-7">https://doi.org/10.1038/s41593-018-0326-7</a>   | <a href="https://www.med.unc.edu/pgc/results-and-downloads/">https://www.med.unc.edu/pgc/results-and-downloads/</a>                                                                                                                                                                                                                       |
| Psychiatry      | Obsessive-compulsive disorder                   | Both             | Arnold, 2018    | <a href="https://doi.org/10.1038/mp.2017.154">https://doi.org/10.1038/mp.2017.154</a>               | <a href="https://www.med.unc.edu/pgc/results-and-downloads/">https://www.med.unc.edu/pgc/results-and-downloads/</a>                                                                                                                                                                                                                       |
| Psychiatry      | Schizophrenia                                   | Adult            | Pardiñas, 2018  | <a href="https://doi.org/10.1038/s41588-018-0059-2">https://doi.org/10.1038/s41588-018-0059-2</a>   | <a href="https://walters.nsvcm.cf.ac.uk/clozok_pg2.meta.sumstats.txt.gz">https://walters.nsvcm.cf.ac.uk/clozok_pg2.meta.sumstats.txt.gz</a>                                                                                                                                                                                               |
| Psychological   | Childhood aggression, overall                   | Child            | Ip, 2019        | <a href="https://doi.org/10.1101/854927">https://doi.org/10.1101/854927</a>                         | Authors                                                                                                                                                                                                                                                                                                                                   |
| Psychological   | Childhood aggression, maternal report           | Child            | Ip, 2019        | <a href="https://doi.org/10.1101/854927">https://doi.org/10.1101/854927</a>                         | Authors                                                                                                                                                                                                                                                                                                                                   |
| Psychological   | Childhood aggression, teacher report            | Child            | Ip, 2019        | <a href="https://doi.org/10.1101/854927">https://doi.org/10.1101/854927</a>                         | Authors                                                                                                                                                                                                                                                                                                                                   |
| Psychological   | Childhood aggression, self report               | Child            | Ip, 2019        | <a href="https://doi.org/10.1101/854927">https://doi.org/10.1101/854927</a>                         | Authors                                                                                                                                                                                                                                                                                                                                   |
| Psychological   | Loneliness                                      | Adult            | Day, 2018       | <a href="https://doi.org/10.1038/s41467-018-04930-1">https://doi.org/10.1038/s41467-018-04930-1</a> | <a href="https://www.repository.cam.ac.uk/bitstream/handle/1810/277812/Day_2018_NatComs_Social.tar.gz?sequence=1&amp;isAllowed=y">https://www.repository.cam.ac.uk/bitstream/handle/1810/277812/Day_2018_NatComs_Social.tar.gz?sequence=1&amp;isAllowed=y</a>                                                                             |
| Psychological   | Neuroticism                                     | Adult            | Nagel, 2018     | <a href="https://doi.org/10.1038/s41588-018-0151-7">https://doi.org/10.1038/s41588-018-0151-7</a>   | <a href="https://ctc.cncr.nl/documents/p1651/sumstats_neuroticism_ctc_format.txt.gz">https://ctc.cncr.nl/documents/p1651/sumstats_neuroticism_ctc_format.txt.gz</a>                                                                                                                                                                       |
| Psychological   | Well-being spectrum                             | Adult            | Baselmans, 2019 | <a href="https://doi.org/10.1038/s41588-018-0320-8">https://doi.org/10.1038/s41588-018-0320-8</a>   | <a href="https://surfdrive.surf.nl/files/index.php/s/Ow1qCDpFT421Z00/download?path=%2F&amp;files=N_GWAMA_WBSpectrum_no23andMe.txt_04072019.txt.gz">https://surfdrive.surf.nl/files/index.php/s/Ow1qCDpFT421Z00/download?path=%2F&amp;files=N_GWAMA_WBSpectrum_no23andMe.txt_04072019.txt.gz</a>                                           |
| Psychological   | Insomnia                                        | Adult            | Jansen, 2019    | <a href="https://doi.org/10.1038/s41588-018-0333-3">https://doi.org/10.1038/s41588-018-0333-3</a>   | <a href="https://ctc.cncr.nl/documents/p1651/Insomnia_sumstats_Jansenetal.txt.gz">https://ctc.cncr.nl/documents/p1651/Insomnia_sumstats_Jansenetal.txt.gz</a>                                                                                                                                                                             |
| Physical health | Coronary artery disease                         | Adult            | Nikpay, 2019    | <a href="https://doi.org/10.1038/ng.3396">https://doi.org/10.1038/ng.3396</a>                       | <a href="http://www.cardiogramplusc4d.org/media/cardiogramplusc4d-consortium/data-downloads/cad_additive_Oct2015_nub.zip">http://www.cardiogramplusc4d.org/media/cardiogramplusc4d-consortium/data-downloads/cad_additive_Oct2015_nub.zip</a>                                                                                             |
| Reproduction    | Age at menarche                                 | Adult            | Day, 2017       | <a href="https://doi.org/10.1038/ng.3841">https://doi.org/10.1038/ng.3841</a>                       | <a href="https://www.reprogen.org/Menarche_1KG_NatGen2017_WebsiteUpload.zip">https://www.reprogen.org/Menarche_1KG_NatGen2017_WebsiteUpload.zip</a>                                                                                                                                                                                       |
| Reproduction    | Age at first birth                              | Adult            | Barban, 2016    | <a href="https://doi.org/10.1038/ng.3698">https://doi.org/10.1038/ng.3698</a>                       | <a href="http://sociogenome.com/material/GWASresults/AgeFirstBirth_Pooled.txt.gz">http://sociogenome.com/material/GWASresults/AgeFirstBirth_Pooled.txt.gz</a>                                                                                                                                                                             |
| Substance use   | Smoking initiation                              | Both             | Liu, 2019       | <a href="https://doi.org/10.1038/s41588-018-0307-5">https://doi.org/10.1038/s41588-018-0307-5</a>   | <a href="https://conservancy.umn.edu/bitstream/handle/11299/201564/SmokingInitiation.txt.gz?sequence=27&amp;isAllowed=y">https://conservancy.umn.edu/bitstream/handle/11299/201564/SmokingInitiation.txt.gz?sequence=27&amp;isAllowed=y</a>                                                                                               |
| Substance use   | Cigarettes per day                              | Both             | Liu, 2019       | <a href="https://doi.org/10.1038/s41588-018-0307-5">https://doi.org/10.1038/s41588-018-0307-5</a>   | <a href="https://conservancy.umn.edu/bitstream/handle/11299/201564/CigarettesPerDay.txt.gz?sequence=17&amp;isAllowed=y">https://conservancy.umn.edu/bitstream/handle/11299/201564/CigarettesPerDay.txt.gz?sequence=17&amp;isAllowed=y</a>                                                                                                 |
| Substance use   | Drinks per week                                 | Both             | Liu, 2019       | <a href="https://doi.org/10.1038/s41588-018-0307-5">https://doi.org/10.1038/s41588-018-0307-5</a>   | <a href="https://conservancy.umn.edu/bitstream/handle/11299/201564/DrinksPerWeek.txt.gz?sequence=18&amp;isAllowed=y">https://conservancy.umn.edu/bitstream/handle/11299/201564/DrinksPerWeek.txt.gz?sequence=18&amp;isAllowed=y</a>                                                                                                       |
| Cognition       | Educational attainment                          | Adult            | Lee, 2018       | <a href="https://doi.org/10.1038/s41588-018-0147-3">https://doi.org/10.1038/s41588-018-0147-3</a>   | <a href="https://www.dropbox.com/s/hp58e9jmytmapf8/GWAS_EA_excl23andMe.txt?dl=0">https://www.dropbox.com/s/hp58e9jmytmapf8/GWAS_EA_excl23andMe.txt?dl=0</a>                                                                                                                                                                               |
| Cognition       | Intelligence                                    | Both             | Savage, 2018    | <a href="https://doi.org/10.1038/s41588-018-0152-6">https://doi.org/10.1038/s41588-018-0152-6</a>   | <a href="https://ctc.cncr.nl/documents/p1651/SavageJansen_IntMeta_sumstats.zip">https://ctc.cncr.nl/documents/p1651/SavageJansen_IntMeta_sumstats.zip</a>                                                                                                                                                                                 |
| Anthropometric  | Body-mass index (BMI)                           | Adult            | Yengo, 2018     | <a href="https://doi.org/10.1093/hmg/ddv271">https://doi.org/10.1093/hmg/ddv271</a>                 | <a href="http://ensgenomics.com/data/yengo_et_al_2018_hmg/Meta-analysis_Locke_et_al+UKBiobank_2018_UPDATED.txt.gz">http://ensgenomics.com/data/yengo_et_al_2018_hmg/Meta-analysis_Locke_et_al+UKBiobank_2018_UPDATED.txt.gz</a>                                                                                                           |
| Anthropometric  | Height                                          | Adult            | Yengo, 2018     | <a href="https://doi.org/10.1093/hmg/ddv271">https://doi.org/10.1093/hmg/ddv271</a>                 | <a href="http://ensgenomics.com/data/yengo_et_al_2018_hmg/Meta-analysis_Wood_et_al+UKBiobank_2018.txt.gz">http://ensgenomics.com/data/yengo_et_al_2018_hmg/Meta-analysis_Wood_et_al+UKBiobank_2018.txt.gz</a>                                                                                                                             |

**Table S10** Top 10 genes from MAGMA gene-based test

CHR = chromosome; START = first base pair position; END = last base pair position; NSNPS = number of included SNPs; NPARAM = the number of relevant parameters used in the model; N = sample size; ZSTAT = Z-score of the association; P = p-value

| GENE     | CHR | START     | STOP      | NSNPS | NPARAM | N      | ZSTAT  | P        |
|----------|-----|-----------|-----------|-------|--------|--------|--------|----------|
| CCL26    | 7   | 75398851  | 75419214  | 68    | 6      | 91224  | 4.3624 | 6.43E-06 |
| ARHGAP27 | 17  | 43471275  | 43511787  | 94    | 6      | 105289 | 4.3219 | 7.73E-06 |
| CENPO    | 2   | 25016005  | 25045245  | 53    | 7      | 121977 | 4.2089 | 1.28E-05 |
| RNF17    | 13  | 25338290  | 25454059  | 288   | 14     | 125625 | 4.2004 | 1.33E-05 |
| PLEKHM1  | 17  | 43513266  | 43568115  | 78    | 4      | 102143 | 4.1419 | 1.72E-05 |
| PTRHD1   | 2   | 25012603  | 25016251  | 9     | 3      | 127234 | 4.1133 | 1.95E-05 |
| CENPJ    | 13  | 25457171  | 25497018  | 90    | 12     | 125402 | 3.9077 | 4.66E-05 |
| FAM73A   | 1   | 78245309  | 78344106  | 51    | 7      | 112008 | 3.7949 | 7.39E-05 |
| WNT3     | 17  | 44839872  | 44910520  | 90    | 13     | 101004 | 3.6071 | 1.55E-04 |
| FAM162B  | 6   | 117073363 | 117086886 | 33    | 6      | 115633 | 3.5847 | 1.69E-04 |

**Table S11** MAGMA tissue expression analyses

SE = standard error; P = p-value

| 30 broad tissue types |             |           |          | 53 specific tissue types              |            |           |           |
|-----------------------|-------------|-----------|----------|---------------------------------------|------------|-----------|-----------|
| VARIABLE              | BETA        | SE        | P        | VARIABLE                              | BETA       | SE        | P         |
| Brain                 | 0.015076    | 0.0066204 | 0.011395 | Brain_Anterior_cingulate_cortex_BA24  | 0.018651   | 0.0069528 | 0.0036567 |
| Stomach               | 0.020195    | 0.013163  | 0.062495 | Brain_Frontal_Cortex_BA9              | 0.016635   | 0.0066165 | 0.0059698 |
| Pituitary             | 0.0093882   | 0.0079843 | 0.11984  | Brain_Cortex                          | 0.01694    | 0.0068568 | 0.0067513 |
| Colon                 | 0.017582    | 0.01543   | 0.12727  | Brain_Amygdala                        | 0.017202   | 0.0075484 | 0.011345  |
| Blood_Vessel          | 0.011474    | 0.011324  | 0.15547  | Brain_Hypothalamus                    | 0.015908   | 0.0078102 | 0.020843  |
| Adipose_Tissue        | 0.012417    | 0.012882  | 0.16757  | Brain_Nucleus_accumbens_basal_ganglia | 0.014838   | 0.0073132 | 0.021243  |
| Testis                | 0.005178    | 0.0054295 | 0.17013  | Brain_Cerebellum                      | 0.012165   | 0.0060643 | 0.02244   |
| Blood                 | 0.0043934   | 0.0060019 | 0.23209  | Brain_Cerebellar_Hemisphere           | 0.011349   | 0.0058849 | 0.026906  |
| Breast                | 0.01081     | 0.015224  | 0.23884  | Brain_Hippocampus                     | 0.012705   | 0.0076773 | 0.048988  |
| Nerve                 | 0.007002    | 0.0099397 | 0.24058  | Brain_Caudate_basal_ganglia           | 0.010792   | 0.0075715 | 0.077034  |
| Uterus                | 0.0062439   | 0.011603  | 0.29524  | Brain_Putamen_basal_ganglia           | 0.010145   | 0.007634  | 0.091945  |
| Esophagus             | 0.0088292   | 0.01671   | 0.29862  | Brain_Spinal_cord_cervical_c-1        | 0.0092582  | 0.0083017 | 0.13239   |
| Ovary                 | 0.0019138   | 0.0099615 | 0.42383  | Brain_Substantia_nigra                | 0.0080862  | 0.0082645 | 0.16394   |
| Liver                 | -0.00013442 | 0.0063287 | 0.50847  | Testis                                | 0.0036998  | 0.0054236 | 0.24757   |
| Salivary_Gland        | -0.00080142 | 0.010432  | 0.53062  | Pituitary                             | 0.0054668  | 0.0085721 | 0.26183   |
| Muscle                | -0.0018264  | 0.0067093 | 0.60727  | Whole_Blood                           | 0.0031159  | 0.0054488 | 0.28372   |
| Fallopian_Tube        | -0.0039227  | 0.013497  | 0.61433  | Stomach                               | 0.0058197  | 0.011537  | 0.30699   |
| Bladder               | -0.0048272  | 0.015741  | 0.62045  | Artery_Tibial                         | 0.004642   | 0.0096294 | 0.31488   |
| Skin                  | -0.0036457  | 0.0097597 | 0.64563  | Colon_Sigmoid                         | 0.0025874  | 0.012134  | 0.41557   |
| Cervix_Uteri          | -0.0056547  | 0.013728  | 0.65979  | Esophagus_Muscularis                  | 0.0013069  | 0.012026  | 0.45673   |
| Vagina                | -0.0064647  | 0.012352  | 0.69964  | Adipose_Subcutaneous                  | 0.00088892 | 0.0103    | 0.46561   |
| Pancreas              | -0.005696   | 0.0084993 | 0.74862  | Esophagus_Gastroesophageal_Junction   | -0.000784  | 0.012402  | 0.5252    |
| Spleen                | -0.0054981  | 0.0076198 | 0.76471  | Nerve_Tibial                          | -0.0008784 | 0.0096087 | 0.53642   |
| Lung                  | -0.0080747  | 0.010174  | 0.78629  | Adipose_Visceral_Omentum              | -0.002286  | 0.010708  | 0.58452   |
| Kidney                | -0.0086463  | 0.0091343 | 0.82806  | Artery_Aorta                          | -0.0021257 | 0.0098409 | 0.58551   |
| Adrenal_Gland         | -0.014411   | 0.010095  | 0.92327  | Colon_Transverse                      | -0.0027239 | 0.011182  | 0.59623   |
| Small_Intestine       | -0.015483   | 0.010505  | 0.92972  | Breast_Mammary_Tissue                 | -0.0045121 | 0.012093  | 0.64547   |
| Prostate              | -0.022928   | 0.013405  | 0.9564   | Uterus                                | -0.0039259 | 0.010513  | 0.64558   |
| Heart                 | -0.016299   | 0.0092995 | 0.96016  | Liver                                 | -0.0024463 | 0.0061166 | 0.6554    |
| Thyroid               | -0.022236   | 0.01048   | 0.98306  | Cells_Cultured_fibroblasts            | -0.0035796 | 0.0063728 | 0.71283   |
|                       |             |           |          | Cells_EBV-transformed_lymphocytes     | -0.0026727 | 0.0047083 | 0.71486   |
|                       |             |           |          | Ovary                                 | -0.0053277 | 0.0093426 | 0.71575   |
|                       |             |           |          | Artery_Coronary                       | -0.0078348 | 0.011418  | 0.7537    |
|                       |             |           |          | Minor_Salivary_Gland                  | -0.0067584 | 0.0092147 | 0.76835   |
|                       |             |           |          | Muscle_Skeletal                       | -0.0050746 | 0.0067316 | 0.77452   |
|                       |             |           |          | Skin_Sun_Exposed_Lower_leg            | -0.0067165 | 0.0074428 | 0.81658   |
|                       |             |           |          | Esophagus_Mucosa                      | -0.0067249 | 0.0073252 | 0.8207    |
|                       |             |           |          | Skin_Not_Sun_Exposed_Suprapubic       | -0.0068849 | 0.0074223 | 0.82318   |
|                       |             |           |          | Cervix_Ectocervix                     | -0.013104  | 0.011698  | 0.86869   |
|                       |             |           |          | Fallopian_Tube                        | -0.012932  | 0.011436  | 0.87093   |
|                       |             |           |          | Pancreas                              | -0.009344  | 0.0081166 | 0.87517   |
|                       |             |           |          | Spleen                                | -0.008381  | 0.0070843 | 0.8816    |
|                       |             |           |          | Bladder                               | -0.01589   | 0.012693  | 0.89468   |
|                       |             |           |          | Vagina                                | -0.013492  | 0.010666  | 0.89704   |
|                       |             |           |          | Lung                                  | -0.011759  | 0.008799  | 0.90928   |
|                       |             |           |          | Cervix_Endocervix                     | -0.015008  | 0.011121  | 0.91141   |
|                       |             |           |          | Kidney_Cortex                         | -0.012667  | 0.0086335 | 0.92883   |
|                       |             |           |          | Kidney_Medulla                        | -0.015263  | 0.0088533 | 0.95764   |
|                       |             |           |          | Heart_Left_Ventricle                  | -0.017038  | 0.008801  | 0.97355   |
|                       |             |           |          | Small_Intestine_Terminal_Ileum        | -0.018118  | 0.0092724 | 0.97464   |
|                       |             |           |          | Adrenal_Gland                         | -0.020882  | 0.0097723 | 0.98369   |
|                       |             |           |          | Prostate                              | -0.026999  | 0.01153   | 0.99039   |
|                       |             |           |          | Thyroid                               | -0.024534  | 0.0093667 | 0.99559   |
|                       |             |           |          | Heart_Atrial_Appendage                | -0.025181  | 0.0092355 | 0.9968    |

**Table S12** Top 10 gene sets from MAGMA gene-set tissue analysis

N genes = number of genes; STD = standardised; SE = standard error; P = p-value

| Gene set                                                         | N genes | Beta    | Beta STD | SE       | P          |
|------------------------------------------------------------------|---------|---------|----------|----------|------------|
| GO_cc:go_translation_preinitiation_complex                       | 15      | 0.70132 | 0.019913 | 0.19642  | 0.00017861 |
| Curated_gene_sets:rickman_head_and_neck_cancer_d                 | 33      | 0.52195 | 0.021971 | 0.14685  | 0.00019003 |
| Curated_gene_sets:benporath_myc_targets_with_ebox                | 209     | 0.18605 | 0.019616 | 0.05377  | 0.0002706  |
| GO_bp:go_gmp_metabolic_process                                   | 8       | 0.89822 | 0.018629 | 0.26308  | 0.00032051 |
| Curated_gene_sets:ren_alveolar_rhabdomyosarcoma_up               | 95      | 0.28963 | 0.020651 | 0.085015 | 0.00032946 |
| GO_bp:go_cytoplasmic_translational_initiation                    | 27      | 0.49469 | 0.018839 | 0.1454   | 0.00033495 |
| GO_cc:go_mcm_complex                                             | 11      | 0.67667 | 0.016455 | 0.20034  | 0.00036637 |
| GO_bp:go_positive_regulation_of_receptor_binding                 | 9       | 0.8465  | 0.01862  | 0.25176  | 0.00038731 |
| GO_bp:go_formation_of_cytoplasmic_translation_initiation_complex | 12      | 0.69833 | 0.017736 | 0.21086  | 0.00046443 |
| GO_mf:go_guanylate_kinase_activity                               | 7       | 0.98205 | 0.019052 | 0.29755  | 0.0004837  |

**Table S13** Genetic correlations between internalising symptoms and external phenotypes, ordered by the strength of the correlation with INT<sub>overall</sub> $r_g$  = genetic correlation; se = standard error of the genetic correlation; p = p-valueResults in bold indicate genetic correlations that are statistically different from zero after Bonferroni correction for 2 x 27=54 tests;  $p < 9.26E-04$ 

| Domain          | Trait                                           | INT <sub>overall</sub> |               |                 | INT <sub>self</sub> |               |                 |
|-----------------|-------------------------------------------------|------------------------|---------------|-----------------|---------------------|---------------|-----------------|
|                 |                                                 | $r_g$                  | se            | p               | $r_g$               | se            | p               |
| Psychological   | Well-being spectrum                             | <b>-0.7861</b>         | 0.0966        | <b>4.01E-16</b> | <b>-0.6339</b>      | <b>0.0806</b> | <b>3.59E-15</b> |
| Psychiatry      | Anxiety                                         | <b>0.7612</b>          | <b>0.1303</b> | <b>5.10E-09</b> | <b>0.4564</b>       | <b>0.1062</b> | <b>1.73E-05</b> |
| Psychological   | Neuroticism                                     | <b>0.7581</b>          | <b>0.1015</b> | <b>8.32E-14</b> | <b>0.6585</b>       | <b>0.0846</b> | <b>6.86E-15</b> |
| Psychiatry      | Major depressive disorder                       | <b>0.7162</b>          | <b>0.0978</b> | <b>2.43E-13</b> | <b>0.6006</b>       | <b>0.0881</b> | <b>9.38E-12</b> |
| Psychiatry      | Depressive symptoms*                            | <b>0.6981</b>          | <b>0.0887</b> | <b>3.65E-15</b> | <b>0.5959</b>       | <b>0.0825</b> | <b>4.95E-13</b> |
| Psychological   | Loneliness                                      | <b>0.6019</b>          | <b>0.0956</b> | <b>3.10E-10</b> | <b>0.5913</b>       | <b>0.0871</b> | <b>1.15E-11</b> |
| Psychological   | Childhood aggression, maternal report           | <b>0.5931</b>          | <b>0.1117</b> | <b>1.11E-07</b> | 0.1898              | 0.1406        | 0.1771          |
| Psychological   | Childhood aggression, overall                   | <b>0.5778</b>          | <b>0.1075</b> | <b>7.74E-08</b> | 0.3132              | 0.1236        | 0.0113          |
| Psychiatry      | Attention deficit hyperactivity disorder (ADHD) | <b>0.5614</b>          | <b>0.1165</b> | <b>1.43E-06</b> | <b>0.4874</b>       | <b>0.101</b>  | <b>1.40E-06</b> |
| Psychiatry      | Autism spectrum disorder                        | <b>0.5114</b>          | <b>0.1193</b> | <b>1.82E-05</b> | 0.4014              | 0.1216        | 0.001           |
| Psychological   | Insomnia                                        | <b>0.4234</b>          | <b>0.0813</b> | <b>1.89E-07</b> | <b>0.2798</b>       | <b>0.077</b>  | <b>0.0003</b>   |
| Reproduction    | Age at first birth                              | <b>-0.3588</b>         | <b>0.0989</b> | <b>0.0003</b>   | -0.2164             | 0.0875        | 0.0134          |
| Cognition       | Educational attainment                          | <b>-0.3481</b>         | <b>0.0652</b> | <b>9.20E-08</b> | <b>-0.222</b>       | <b>0.0587</b> | <b>0.0002</b>   |
| Substance use   | Cigarettes per day                              | <b>-0.3398</b>         | <b>0.0884</b> | <b>0.0001</b>   | <b>-0.3194</b>      | <b>0.0764</b> | <b>2.87E-05</b> |
| Psychological   | Childhood aggression, self report               | 0.3336                 | 0.1494        | 0.0256          | <b>0.6612</b>       | <b>0.1513</b> | <b>1.23E-05</b> |
| Cognition       | Intelligence                                    | <b>-0.3255</b>         | <b>0.0733</b> | <b>9.04E-06</b> | -0.1271             | 0.0616        | 0.0392          |
| Psychiatry      | Schizophrenia                                   | 0.2031                 | 0.0671        | 0.0025          | 0.1439              | 0.0655        | 0.0281          |
| Substance use   | Drinks per week                                 | 0.192                  | 0.076         | 0.0115          | 0.0038              | 0.0658        | 0.9538          |
| Anthropometric  | Body-mass index (BMI)                           | 0.1738                 | 0.0599        | 0.0037          | <b>0.2069</b>       | <b>0.0592</b> | <b>0.0005</b>   |
| Anthropometric  | Height                                          | -0.1532                | 0.0468        | 0.0011          | -0.0985             | 0.0477        | 0.0391          |
| Psychiatry      | Bipolar disorder                                | 0.0779                 | 0.0794        | 0.3266          | 0.0216              | 0.0784        | 0.7833          |
| Reproduction    | Age at menarche                                 | -0.067                 | 0.0583        | 0.2508          | -0.1561             | 0.0524        | 0.0029          |
| Physical health | Coronary artery disease                         | 0.0524                 | 0.0774        | 0.4983          | 0.0767              | 0.0805        | 0.3407          |
| Substance use   | Smoking initiation                              | -0.0494                | 0.0542        | 0.3616          | <b>-0.211</b>       | <b>0.0573</b> | <b>0.0002</b>   |
| Psychiatry      | Obsessive-compulsive disorder                   | -0.0247                | 0.1586        | 0.8765          | -0.1583             | 0.1455        | 0.2765          |
| Psychiatry      | Anorexia Nervosa                                | -0.0196                | 0.0839        | 0.8148          | 0.0727              | 0.0815        | 0.3725          |
| Psychological   | Childhood aggression, teacher report            | -0.015                 | 0.1521        | 0.9216          | 0.0964              | 0.1707        | 0.572           |

\*= depressive symptoms were reverse-coded in the GWAS, so that higher score meant fewer depressive symptoms. Subsequently, the SNP effects were reversed for the calculation of  $r_g$



**Table S14** Polygenic score analyses

M7 = maternal-report at age 7; S13to18 = self-report during adolescence; N = sample size; se = standard error; p = p-value;  $r^2$  = percentage of variance explained

Bold p-values indicate scores with significant beta's after Bonferroni correction for 2 tests;  $p < 0.025$

| Predictor - PGS | Outcome - phenotype    | N    | Prior | beta       | se         | p                  | $r^2$      |
|-----------------|------------------------|------|-------|------------|------------|--------------------|------------|
| INT overall     | Internalising, M7      | 3845 | 0.5   | 0.06180371 | 0.0182518  | <b>0.000708752</b> | 0.3819699  |
| INT overall     | Internalising, S13to18 | 2679 | 0.5   | 0.01759981 | 0.02006937 | 0.3805144          | 0.03097534 |
